# Supplementary material for: Evaluating the effectiveness of quantitative descriptions of Earth Science phenomena during outreach activities
Source: Copernicus journal article supplement (doi:10.5194/gc-8-319-2025), 2025-10-21
Supplement: Supplementary file 2 [file Questionnaire_BRIGHT_ITA.pdf › Questionnaires/Questionnaire_BRIGHT_ITA.pdf]

# Scopriamo le Geoscienze: il tuo interesse e la tua comprensione dei fenomeni naturali

La Terra ha tanto da raccontare, e tu? Questo questionario è il primo passo per esplorare il nostro pianeta e capire quanto già sai... o quanto potresti ancora imparare!

\* Indica una domanda obbligatoria

In che classe sei? \*

*Contrassegna solo un ovale.*

- ☐ 4A
- ☐ 4B
- ☐ 4C
- ☐ 4D

1b. Quanto sei interessato/a alla ricerca scientifica? \*

*Contrassegna solo un ovale.*

- ☐ Per niente interessato/a
- ☐ Poco interessato/a
- ☐ Abbastanza interessato/a
- ☐ Molto interessato/a

2b. Ti piacerebbe lavorare in un campo scientifico in futuro? \*

*Contrassegna solo un ovale.*

- ☐ Sì, certamente
- ☐ Forse, ma non sono sicuro/a
- ☐ No, non mi interessa

3b. Quanto sei interessato/a a studiare geologia, geofisica o altre scienze della Terra all'università?

*Contrassegna solo un ovale.*

- ☐ Per niente interessato/a
- ☐ Poco interessato/a
- ☐ Abbastanza interessato/a
- ☐ Molto interessato/a

4b. Sai cos'è l'INGV e di cosa si occupa? \*

*Contrassegna solo un ovale.*

- ☐ Sì, e so spiegare bene alcune delle sue attività
- ☐ Sì, ma ho solo una vaga idea di cosa faccia
- ☐ No, non lo conosco

5b. Quanto pensi che attività pratiche o laboratoriali aiutino a comprendere i fenomeni naturali?

*Contrassegna solo un ovale.*

- ☐ Sono fondamentali per capire meglio i fenomeni
- ☐ Sono utili, ma non indispensabili
- ☐ Sono interessanti ma non utili per comprendere meglio i fenomeni
- ☐ Sono solo un modo divertente di passare il tempo

6b. L'attività didattica che hai svolto a scuola ha aumentato il tuo interesse per le scienze della Terra?

*Contrassegna solo un ovale.*

- ☐ Sì, mi ha fatto scoprire un nuovo interesse
- ☐ Mi ha confermato un interesse che avevo già
- ☐ Non mi ha interessato
- ☐ Non ho partecipato all'attività didattica

Quanto conosci i seguenti concetti scientifici? \*

*Contrassegna solo un ovale per riga.*

|      |                                  | Nulla                 | Poco                  | Abbastanza            | Molto                 |
|------|----------------------------------|-----------------------|-----------------------|-----------------------|-----------------------|
| 7b.  | <b>Densità</b>                   | <input type="radio"/> | <input type="radio"/> | <input type="radio"/> | <input type="radio"/> |
| 8b.  | <b>Viscosità</b>                 | <input type="radio"/> | <input type="radio"/> | <input type="radio"/> | <input type="radio"/> |
| 9b.  | <b>Epicentro di un terremoto</b> | <input type="radio"/> | <input type="radio"/> | <input type="radio"/> | <input type="radio"/> |
| 10b. | <b>Ipocentro di un terremoto</b> | <input type="radio"/> | <input type="radio"/> | <input type="radio"/> | <input type="radio"/> |

11b. Quali sono i fattori che influenzano la tipologia di un'eruzione? \*

*Contrassegna solo un ovale.*

- ☐ Le eruzioni esplosive sono favorite in magmi ad alta viscosità e basso contenuto di gas
- ☐ Le eruzioni esplosive sono favorite in magmi a bassa viscosità e basso contenuto di gas
- ☐ Le eruzioni esplosive sono favorite in magmi a bassa viscosità e alto contenuto di gas
- ☐ Le eruzioni esplosive sono favorite in magmi ad alta viscosità e alto contenuto di gas

12b. Qual è il ruolo della viscosità nelle eruzioni esplosive? \*

*Contrassegna solo un ovale.*

- ☐ Le alte viscosità comportano anche un'alta densità del magma
- ☐ Le alte viscosità ostacolano la fuoriuscita dei gas, causando l'accumulo di pressione all'interno del magma
- ☐ Le alte viscosità facilitano il rilascio di gas prima dell'eruzione, riducendo così la pressione in profondità
- ☐ Le alte viscosità causano un aumento di temperatura del magma

13b. Qual è la relazione tra la viscosità di un magma e la velocità di risalita delle bolle di gas al suo interno?

*Contrassegna solo un ovale.*

- ☐ Nei magmi a bassa viscosità, le bolle risalgono più velocemente rispetto a quelli ad alta viscosità
- ☐ La velocità di risalita delle bolle di gas dipende solo dalla loro densità
- ☐ Nei magmi a bassa viscosità, le bolle risalgono più lentamente rispetto a quelli a alta viscosità
- ☐ Le bolle risalgono alla stessa velocità indipendentemente dalla viscosità del magma

14b. Come si può calcolare la viscosità di un liquido osservando la risalita delle bolle al suo interno?

*Contrassegna solo un ovale.*

- ☐ Misurando la dimensione delle bolle e confrontandola con parametri noti che descrivono il comportamento del liquido
- ☐ Misurando il diametro delle bolle, e se si conosce la temperatura del liquido, si può ricavare la viscosità
- ☐ Misurando la velocità di risalita e le dimensioni delle bolle, e bilanciando le forze coinvolte: gravità, galleggiamento, resistenza viscosa
- ☐ Confrontando il colore del liquido con una tabella standard che associa tonalità diverse a differenti proprietà fisiche

- 15b. Perché è importante combinare esperimenti in laboratorio e simulazioni numeriche al computer nello studio di fenomeni naturali come le eruzioni vulcaniche?

*Contrassegna solo un ovale.*

- ☐ Perché entrambe le tecniche servono a evitare di fare osservazioni dirette sul campo
- ☐ Perché esperimenti e simulazioni numeriche si completano nel descrivere e interpretare le manifestazioni vulcaniche
- ☐ Perché le simulazioni numeriche sono sempre più affidabili degli esperimenti reali
- ☐ Perché solo esperimenti e simulazioni permettono di stimare con certezza se e quando avverrà l'eruzione

- 16b. Di quanto aumenta l'energia rilasciata da un terremoto di magnitudo  $M=5$  rispetto ad un terremoto di magnitudo  $M=3$ ?

*Contrassegna solo un ovale.*

- ☐ 2 volte
- ☐ 10 volte
- ☐ 30 volte
- ☐ 900 volte

17b. Quale di queste affermazioni è vera? \*

*Contrassegna solo un ovale.*

- ☐ Allontanandosi dall'ipocentro di un terremoto, la differenza dei tempi di arrivo delle onde sismiche ( $t_S - t_P$ ) rimangono invariati
- ☐ Le onde sismiche perdono energia man mano che si propagano dall'ipocentro del terremoto
- ☐ Per calcolare l'epicentro di un terremoto bisogna determinare l'ampiezza dell'arrivo delle onde S
- ☐ La magnitudo Richter di un terremoto si calcola dal rapporto tra la misura dell'ampiezza delle onde S e la misura della durata della scossa

18b. Cosa sono le dromocrone? \*

*Contrassegna solo un ovale.*

- ☐ Sono diagrammi spazio-tempo che rappresentano i tempi di arrivo delle onde sismiche
- ☐ Sono strumenti utilizzati per registrare la profondità degli ipocentri
- ☐ Sono grafici che mostrano la variazione di intensità delle scosse sismiche nel tempo
- ☐ Sono mappe che rappresentano la distribuzione geografica dei terremoti

19b. Cos'è il sismometro? \*

*Contrassegna solo un ovale.*

- ☐ È uno strumento che misura solo le vibrazioni del suolo dovute al passaggio delle onde sismiche
- ☐ È uno strumento che misura tutte le vibrazioni del suolo comprese quelle dovute al vento o al passaggio di un'auto
- ☐ È uno strumento che misura la temperatura e l'umidità del suolo
- ☐ È uno strumento che misura il danneggiamento degli edifici dovuto al passaggio delle onde sismiche

20b. Qual è la principale differenza tra la scala Richter e la scala Mercalli? \*

*Contrassegna solo un ovale.*

- ☐ La scala Richter misura l'intensità del danno causato da un terremoto, mentre la scala Mercalli misura l'energia rilasciata
- ☐ La scala Richter misura l'energia rilasciata da un terremoto, mentre la scala Mercalli misura l'intensità del danno osservato
- ☐ La scala Richter e la scala Mercalli misurano entrambe l'energia rilasciata, ma utilizzano unità diverse
- ☐ La scala Mercalli misura la magnitudo del terremoto, mentre la scala Richter misura l'intensità percepita
