# Supplementary material for: Evaluating the effectiveness of quantitative descriptions of Earth Science phenomena during outreach activities
Source: Copernicus journal article supplement (doi:10.5194/gc-8-319-2025), 2025-10-21
Supplement: Supplementary file 3 [file questionnarie_IO_NON_RISCHIO_POST_ENG.pdf › Questionnaires/questionnarie_IO_NON_RISCHIO_POST_ENG.pdf]

# I don't take risks - Tsunami

Thank you for participating in the 'I don't take risks' survey!

\* Please answer a required question

7i. Was your knowledge before the experiment sufficient to understand what you have just seen? \*

*Select only one option.*

- ☐ Yes
- ☐ No
- ☐ I don't know

8i. Was the language used appropriate? \*

*Select only one option.*

- ☐ Yes
- ☐ No

9i. Did the experiment change your perception/interest in scientific research? \*

*Select only one option.*

- ☐ Yes
- ☐ No

10i. On average, at what speed do tsunami waves travel at Stromboli? \*

*Select only one option.*

- ☐ 1 cm/s
- ☐ 10 m/s
- ☐ 1 km/s
- ☐ I don't know

11i. What information can we DIRECTLY obtain from the study of waveforms? \*

*Select only one option.*

- ☐ Sea depth at the triggering area
- ☐ Volume of the landslide
- ☐ Maximum inundation distance from the coastline
- ☐ Maximum wave height
- ☐ Type of trigger (landslide, earthquake, etc...)

12i. Which geographical areas of Italy do you think are most likely to be affected by volcanically-induced tsunamis? \*

*Select only one option.*

- ☐ Regions bordering the Tyrrhenian sea
- ☐ Regions bordering the Ligurian sea
- ☐ Regions bordering the Ionian sea
