# Supplementary material for: Evaluating the effectiveness of quantitative descriptions of Earth Science phenomena during outreach activities
Source: Copernicus journal article supplement (doi:10.5194/gc-8-319-2025), 2025-10-21
Supplement: Supplementary file 4 [file questionnarie_IO_NON_RISCHIO_POST_ITA.pdf › Questionnaires/questionnarie_IO_NON_RISCHIO_POST_ITA.pdf]

# Io non rischio - Tsunami

Grazie per la vostra partecipazione al sondaggio di Io non rischio!

\* Indica una domanda obbligatoria

- 7i. Quello che conoscevi prima dell'esperimento era sufficiente per comprendere ciò che hai appena visto? \*

*Contrassegna solo un ovale.*

- ☐ Sì
- ☐ No
- ☐ Non saprei

- 8i. Il linguaggio utilizzato è stato adeguato? \*

*Contrassegna solo un ovale.*

- ☐ Sì
- ☐ No

- 9i. Dopo l'attività svolta, è cambiata la tua percezione /il tuo interesse verso la ricerca scientifica? \*

*Contrassegna solo un ovale.*

- ☐ Sì
- ☐ No

10i. Mediamente, a che velocità viaggiano le onde di uno tsunami a Stromboli? \*

*Contrassegna solo un ovale.*

- ☐ 1 cm/s
- ☐ 10 m/s
- ☐ 1 km/s
- ☐ Non saprei

11i. Quale informazione possiamo ricavare DIRETTAMENTE dallo studio delle forme d'onda? \*

*Contrassegna solo un ovale.*

- ☐ Profondità del mare nella zona di innesco
- ☐ Volume della frana
- ☐ Distanza massima dell'inondazione dalla linea di costa
- ☐ Altezza massima dell'onda
- ☐ Tipologia di innesco (frana, terremoto, etc..)

12i. Quali zone geografiche d'Italia pensi possano avere maggior probabilità di essere soggette a tsunami di origine vulcanica? \*

*Contrassegna solo un ovale.*

- ☐ Regioni che si affacciano sul mar Tirreno
- ☐ Regioni che si affacciano sul mar Ligure
- ☐ Regioni che si affacciano sul mar Ionio
