# Supplementary material for: Evaluating the effectiveness of quantitative descriptions of Earth Science phenomena during outreach activities
Source: Copernicus journal article supplement (doi:10.5194/gc-8-319-2025), 2025-10-21
Supplement: Supplementary file 5 [file questionnarie_IO_NON_RISCHIO_PRE_ENG.pdf › Questionnaires/questionnarie_IO_NON_RISCHIO_PRE_ENG.pdf]

# I don't take risks - Tsunami

Hello, thank you for participating in the 'I don't take risks' survey!

\* Please answer a required question

1i. How far from the coast do you live? \*

*Select only one option.*

- ☐ Between 1 and 3 km
- ☐ More than 3 km
- ☐ I don't know

2i. Do you think your country could be affected by a tsunami? \*

*Select only one option.*

- ☐ Yes
- ☐ No
- ☐ I don't know

3i. Are there places you have visited that could be at risk of tsunamis? \*

*Select only one option.*

- ☐ Yes
- ☐ No
- ☐ I don't know

4i. In your opinion, which of these natural phenomena is the main cause of a tsunami? \*

*Select only one option.*

- ☐ Earthquakes
- ☐ Volcanic eruptions
- ☐ Meteorological events
- ☐ I don't know

5i. Do you think a tsunami wave of about 50 cm can sweep away an adult? \*

*Select only one option.*

- ☐ Yes
- ☐ No
- ☐ I don't know

6i. Do you think recording sea level changes over time can provide information on how tsunamis are generated, propagate and cause flooding? \*

*Select only one option.*

- ☐ No, because sea level varies anyway
- ☐ No, it does not bring benefits
- ☐ Yes, ongoing studies provide useful information to better understand how flooding occurs
- ☐ Yes, but I would like to know more
- ☐ I don't know
