# Supplementary material for: Evaluating the effectiveness of quantitative descriptions of Earth Science phenomena during outreach activities
Source: Copernicus journal article supplement (doi:10.5194/gc-8-319-2025), 2025-10-21
Supplement: Supplementary file 6 [file questionnarie_IO_NON_RISCHIO_PRE_ITA.pdf › Questionnaires/questionnarie_IO_NON_RISCHIO_PRE_ITA.pdf]

# Io non rischio - Tsunami

Salve, grazie per la vostra partecipazione al sondaggio di Io non rischio!

\* Indica una domanda obbligatoria

1i. A che distanza dalla costa vivi? \*

*Contrassegna solo un ovale.*

☐ Tra 1 e 3 km

☐ Oltre 3 km

☐ Non saprei

2i. Pensi che il tuo paese possa essere soggetto a tsunami? \*

*Contrassegna solo un ovale.*

☐ Sì

☐ No

☐ Non saprei

3i. Ci sono luoghi dove ti sei recato che possono essere soggetti al rischio tsunami? \*

*Contrassegna solo un ovale.*

☐ Sì

☐ No

☐ Non saprei

4i. Secondo te quale fra questi fenomeni naturali è la causa maggiore di uno tsunami? \*

*Contrassegna solo un ovale.*

- ☐ Terremoti Eruzioni
- ☐ vulcaniche
- ☐ Fenomeni meteo
- ☐ Non saprei

5i. Pensi che un'onda di tsunami di circa 50 cm può trascinare via una persona adulta? \*

*Contrassegna solo un ovale.*

- ☐ Si
- ☐ No
- ☐ Non saprei

6i. Registrare la variazione del livello del mare nel tempo può fornire informazioni su come si genera, si propaga e come avviene l'inondazione degli tsunami? \*

*Contrassegna solo un ovale.*

- ☐ No, perchè il livello del mare varia di continuo
- ☐ No, credo che studiare alcuni argomenti non porti benefici diretti per le persone
- ☐ Si, gli studi continuativi forniscono informazioni utili per capire meglio come avviene l'inondazione
- ☐ Si, anche se vorrei sapere meglio come
- ☐ Non saprei
