# Supplementary material for: Evaluating the effectiveness of quantitative descriptions of Earth Science phenomena during outreach activities
Source: Copernicus journal article supplement (doi:10.5194/gc-8-319-2025), 2025-10-21
Supplement: Supplementary file [file gc-8-319-2025-supplement-title-page.pdf › gc-8-319-2025-supplement-title-page.pdf]

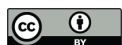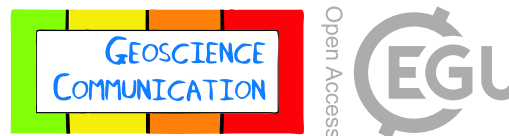

## *Supplement of*

# **Evaluating the effectiveness of quantitative descriptions of Earth Science phenomena during outreach activities**

**Matteo Trolese et al.**

*Correspondence to:* Matteo Trolese ([matteo.trolese@ingv.it](mailto:matteo.trolese@ingv.it)) and Alessandro Tadini ([alessandro.tadini@ingv.it](mailto:alessandro.tadini@ingv.it))

- [gc-8-319-2025-supplement-title-page.pdf](#)
- [Questionnaires.zip](#)
- [Video Supplement 1.zip](#)

The copyright of individual parts of the supplement might differ from the article licence.
